1 ***Arbuscular Mycorrhizal Fungus (AMF) and reduction of arsenic uptake in lentil crops***

2 Mohammad Zahangeer Alam<sup>1\*</sup>, Md. Anamul Hoque<sup>3</sup>, Rebecca McGee<sup>2</sup>, Lynne Carpenter-  
3 Boggs<sup>2</sup>,

4

5 **\*Corresponding email address: mohammad.alam@wsu.edu**

6 <sup>1</sup>Department of Crop and Soil Sciences, Washington State University (WSU) and Department  
7 of Soil Science, Bangladesh Agricultural University (BAU), Mymensingh Bangladesh

8 <sup>2</sup>Department of Crop and Soil Sciences, Washington State University (WSU), Pullman WA  
9 99164-6420 USA

10 <sup>3</sup>Department of Soil Science, Bangladesh Agricultural University (BAU), Mymensingh 2202,  
11 Bangladesh

12 **Present Address:** Department of Environmental Science, Faculty of Agriculture,  
13 Bangabandhu Sheikh Mujibur Rahman Agricultural University (BSMRAU), Gazipur-1706,  
14 Bangladesh.

15

16 **ABSTRACT**

17 Arsenic (As) is a carcinogenic and hazardous substance that poses a serious risk to  
18 human health. Physiological studies have shown that growth of lentil crop have been  
19 impaired due to arsenic toxicity, and is transportable into human food chains. Our research  
20 focused on the transportation of As in lentil crops and its mitigation using Arbuscular  
21 Mycorrhizal Fungus (AMF). Shoot length, fresh and dry weight of shoot and root were found  
22 comparatively higher in 5 and 15 mgkg<sup>-1</sup> arsenic treated lentil seedlings than in a 100 mgkg<sup>-1</sup>  
23 As concentrated soil. As accumulation in lentil's pods of BARI Mashur 1 were found higher  
24 than others; but As uptake in root and shoot were increased significantly in all BARI released  
25 lentil genotypes. Biomass growth of lentil was found higher in AMF treated soils in compare  
26 to non-AMF. AMF effectively reduced the arsenic uptake in root and shoot at 8 and 45 mgkg<sup>-1</sup>  
27 <sup>1</sup> As concentrated soils compared. As free lentil seeds are significantly important for human  
28 consumption through mitigation of As accumulation in lentil roots shoots and pods. AMF  
29 shows great potential in providing As free lentil seeds throughout the world.

30 **Keywords:** Arsenic, AMF, BARI genotypes, lentil, mitigation, root, shoot, pod

31 **1. INTRODUCTION**

32           Arsenic (As) is a natural but hazardous element present in rocks, soils, water, air, and  
33 biological tissues (Hossain, 2006). Research has increased in recent years on the occurrence,  
34 distribution, origin, and mobility of As in soils through natural, geochemical and biological  
35 processes (Leung et al., 2013). According to the U.S. Agency for Toxic Substances and  
36 Disease Registry (ATSDR) priority list of hazardous substances, As has been designated as  
37 the number one hazardous substance in the United States (Leung et al., 2013). Moreover, As  
38 contamination has been reported worldwide in Argentina, Australia, Bangladesh, Chile,  
39 China, Hungary, Mexico, Peru, Thailand, and Vietnam (Ahmed et al., 2011). However, the  
40 most severe As contamination to surface soil, water, and humans is currently in Asia,  
41 particularly Bangladesh, (Ahmed et al., 2011) West Bengal and India (Ahmed et al., 2006).

42           Arsenic has been recognized as a carcinogenic substance based on its chemical and  
43 physical forms as well as concentration and duration of exposure (Singh et al., 2015).  
44 Chemically, it exists as organic and inorganic species. The main sources of arsenic are  
45 arsenic sulphide ( $As_2S_2$ ), arsenic tri-sulphide ( $As_2S_3$ ) and arsenopyrite or ferrous arsenic  
46 sulphide ( $FeAsS_2$ ) (Hossain, 2006). Inorganic As has two main oxidation states (i.e., trivalent  
47 arsenite As(III), and pentavalent arsenate As(V). The inorganic forms of arsenate As(V) and  
48 arsenite As(III) are usually dominant in As contaminated soil. The arsenite As(III) in the  
49 presence of herbicides and pesticides is oxidized into As(V) (Cubadda et al., 2010). Trivalent  
50 arsenite is 60 times more toxic than arsenate (Hossain, 2006).

51           Arsenic causes highly toxic effects on metabolic processes of plants, mitotic  
52 abnormalities, leaf chlorosis, growth inhibition, reduced photosynthesis, DNA replication,  
53 and inhibition of enzymatic activities (Nagajyoti et al., 2010). For instance, root and leaf  
54 elongation of the mesquite plant (*Prosopis juliflora* x *P. velutina*) decreased significantly  
55 with increasing As (III) and As (V) concentrations (Ntebogeng et al., 2008). Heikens et al.  
56 (2006) reports that As contaminated water leads to accumulation in the soil, which is then

57 transported into edible parts of food crops. Arsenite As(III) and arsenate As(V) both are  
58 present in wheat crops due to accumulation from soils to shoots and grains (Cubadda et al.,  
59 2010). In addition, the extensive use of pesticides, fertilizer, groundwater and industrial  
60 wastewater for irrigation purposes in crop fields has resulted in elevated levels of As in soils,  
61 and thus increased As uptake in rice, lentil and vegetables (Ahmed et al., 2011).  
62 Consequently, many food crops have become hazardous including Lentil, which is a major  
63 leguminous crop across the world. These crops are an excellent source of protein, minerals  
64 and vitamins for human nutrition (Guillon and Champ, 2002). Similarly, chronic exposure of  
65 As has led to unacceptable As levels in samples of soils, water, vegetables and cereals.  
66 Subsequently, high Average Daily Dose (ADD) from the environment and low excretion  
67 could result in As toxicity to humans from lentil crops as well as from other food crop  
68 cultivation in As contaminated soils (Cui et al., 2013). Furthermore, As carcinogenicity has  
69 caused serious health diseases, such as lung and skin cancers, and possible damage to liver  
70 and kidneys as well. Noncancerous health effects of As exposure include diabetes, chronic  
71 cough, and cardiovascular and nervous system collapse (SOS, 2011).

72         Currently, Bangladesh is the second largest area of As contamination in the world.  
73 Bangladesh is facing a serious public health threat, with 85 million people at risk of As  
74 contamination in drinking water and food crops. In addition, 85–95% of rice, lentil and  
75 vegetable crops are contaminated by As, which poses a serious threat to human and livestock  
76 health (Hossain, 2006). Therefore, it is imperative for the mitigation of As in crop plants. One  
77 possible solution includes Arbuscular Mycorrhizal Fungi (AMF), which establishes a  
78 mutualistic symbiotic relationship with the majority of terrestrial plant including lentil crops  
79 (Schneider et al., 2013). AMF are actively involved in As accumulation, and affects the  
80 concentration of As, Cd, Zn, and Pb in shoots and roots (Orloska et al., 2012). The effect of  
81 AMF on element uptake can, vary largely, depending on plant species/cultivar and metal

82 concentration in the soil, but also on AM fungal species and isolates (Orloska et al., 2012). In  
83 aerobic soils the main form of As is arsenate As(V). In this form As mimics phosphorus (P),  
84 and can be taken up by lentil plants and AMF by normal P uptake mechanisms (Toulouze et  
85 al., 2012). In this circumstance, mycorrhizal symbioses are significantly highlighted because  
86 they are formed by 90% of higher plants, often with increased uptake of phosphate (P)  
87 compared with non-mycorrhizal (NM) counterparts (Smith et al., 2010). It is clear that the  
88 association of AMF inoculation with lentil crops might reduce As uptake by various  
89 mechanisms (Ahmed et al., 2011). The high proportion of inorganic species of As ( $As_i$ ) is of  
90 particular concern to the human carcinogen through the protein sources of lentil crops. Lentil  
91 is one of the major leguminous crops in the world. The future of agriculture will depend  
92 increasingly upon legume crops because of production of high energy and protein for human  
93 and animal health nutrition. Therefore, As mitigation technique is very much a necessity for  
94 lentil crops as well as other crops. The present research focused to lentil varietal selection  
95 against As and its impact on lentil's biomass. This research also highlights the reduction of  
96 As accumulation in roots, shoots and pods using the Arbuscular Mycorrhizal Fungus (AMF).  
97 It hypothesized that this research is significantly important for the exploration of high and  
98 low As accumulator lentil that will supply arsenic free pods for the consumption to human  
99 populations.

## 100 **2. MATERIALS AND METHODS**

### 101 **2.1. Arsenic accumulation in lentil roots and shoots**

#### 102 **Soil sampling areas**

103 Arsenic contaminated soils were collected for this pot experiment from Mathchar,  
104 Bangladesh Jute Research Institute (BJRI) area (Faridpur) and Bangabandhu Sheikh Mujibur  
105 Rahman Agricultural University (BSMRAU) research field (Gazipur) of Bangladesh, 2015.

106 The Global Positioning System (GPS) are 23<sup>o</sup>35.38969', 24<sup>o</sup>2.17859', & 23<sup>o</sup>35.97636'  
107 Latitudes and 89<sup>o</sup>48.69921', 90<sup>o</sup>23.83393', & 89<sup>o</sup>46.7586' Longitudes in the soil sampling  
108 locations of BJRI, BSMRAU and Mathchar, respectively.

### 109 **Collection of lentil genotypes**

110 Bangladesh Agricultural Research Institute (BARI) is developed eight lentil varieties.  
111 Among these, 7 lentil varieties were procured from BARI for this study. These lentil varieties  
112 are BARI Mashur1, BARI Mashur 2, BARI Mashur 3, BARI Mashur 4, BARI Mashur 5,  
113 BARI Mashur 6 and BARI Mashur 7 (Table 1).

### 114 **Collection of vermi-compost, mineral fertilizers, brick's pots and fungicides**

115 Vermi-compost mixed with soils equally in all treated pots. Urea, Triple Super  
116 Phosphate (TSP) and Muriate of Potash (MOP) applied in soils of this experiment as source  
117 of Nitrogen (N), Phosphorus (P) and Potassium (K), respectively. Vitavax 200 fungicides  
118 used as seed treating chemical for lentil seeds. Clay pots size 6"/6"were used in this  
119 experiment. All types of input materials purchased from the local market of Bangladesh for  
120 this pot experiment.

### 121 **Samples preparation**

122 Soil samples collected from As contaminated regions in Bangladesh using a soil auger  
123 to a depth of 15 cm and brought into the Department of Environmental Science at  
124 Bangabandhu Sheikh Mujibur Rahman Agricultural University (BSMRAU). Before sowing  
125 Lentil seeds in a pot, initial soil samples of 250-300 (g) were taken from each composite  
126 through the guidelines of BARC (2012). The soil was air dried at room temperature in the  
127 laboratory. Samples were then ground and sieved with a  $\leq 250$   $\mu$ m mesh and preserved in  
128 polythene bags with proper labeling. Vermi-compost samples were also prepared for  
129 chemical analysis as well as soil samples. Similarly, seeds, roots and shoots of lentil

130 genotypes were kept in an oven for drying at 55<sup>0</sup>C for 72 hours. Samples were then ground  
131 using coffee grinder and liquid nitrogen and sieved with  $\leq 250$   $\mu$ m mesh.

### 132 **Chemical properties of soil, water, vermi-compost and dry weight of lentil seeds**

133 The pH of soil, irrigation water and vermicompost were determined by glass electrode  
134 pH meter (Jackson 1973). Total N percentage of soil and vermi-compost were determined by  
135 Kjeldhal systems (Jackson, 1973). Available P of soil and vermi-compost were determined by  
136 Olsen, the Bray and Kurz method (Olsen and Sommers, 1982). Exchangeable K of soil and  
137 vermi-compost were estimated by Ammonium Acetate Extraction method (Jackson, 1973).  
138 Available sulfur of soil and vermi-compost were determined by turbidimetrically as barium  
139 sulfate method (Chesnin and Yien, 1951). Dry weight of lentil seeds was measured by digital  
140 electrical balance (Table 1).

### 141 **Mixing of soil, vermi-compost and fertilizers substrate in pot**

142 Collected soil samples were ground uniformly for sowing of lentil seeds. 1500 g  
143 ground soils with 200g vermi-compost were mixed in each pot. According to the  
144 recommendation of Bangladesh Agricultural Research Institute (BARI), Urea 225kgha<sup>-1</sup>, TSP  
145 450kgha<sup>-1</sup> and MOP 175 kgha<sup>-1</sup> were incorporated with soils in each pots. Total nitrogen  
146 (61.33 mgkg<sup>-1</sup>), phosphorus (56.66 mgkg<sup>-1</sup>) and potassium (66.66 mgkg<sup>-1</sup>) were added, in  
147 each experimental pot from synthetic fertilizers. Then 7-10 lentil seeds of each variety sowed  
148 in each pot during the first week of November in 2015.

### 149 **Treatments and replications in pot experiment**

150 Based on the analysis of total arsenic content in soil samples, three soil samples were  
151 selected for treatments. These treatments included T<sub>1</sub> = total arsenic content 5 mgkg<sup>-1</sup>  
152 (BSMRAU soil), T<sub>2</sub> = total arsenic content 15 mgkg<sup>-1</sup> (Mathchar soil- Faridpur) and T<sub>3</sub> = total

153 arsenic content (8+92) =100 mgkg<sup>-1</sup> (BJRI soil- Faridpur). Five replications with seven lentil  
154 varieties were used in these experiments with a 105 total number of pots.

### 155 **Average shoot length, fresh and dry weight of lentil seedlings**

156 At random, average shoot lengths were measured using a measuring tape (cm) at  
157 week 3 in each treated pots. At this time point, three lentil seedlings were thinned out from  
158 each arsenic treated pot. Fresh weights were taken of each sample using electrical balance  
159 (g). Average dry weight of roots and shoots were measured separately after harvesting of  
160 lentil seedlings from each As treated pot during week nine. All samples were dried in an  
161 oven at 55°C for 72 hours towards the digestion of samples for the determination of total As  
162 accumulation in root and shoot of lentil crops from soil samples.

### 163 **2.2. Arsenic uptake in lentil pods during field condition**

164 Simultaneously, seven lentil genotypes were sown on 12 November 2015 in field  
165 soils. For this field experiment, 10 x 5-meter sizes of seven plots were prepared at BSMRAU  
166 research fields. BARI released seven genotypes sown in seven plots separately. All plots  
167 were 5 mgkg<sup>-1</sup> As concentrate soils. Recommended doses of fertilizers were applied to  
168 previous pot experiments. Lentil seedling harvested on 16 February 2016. Total duration was  
169 required 95 days from sowing to harvesting time of lentil crops. During harvesting, three  
170 samples of lentil pods were randomly collected separately from each plot and tagged with  
171 proper marking of each sample. Then samples were dried at room temperature. Next, all  
172 samples were dried in an oven at 55°C for 72 hours towards the digestion of samples for the  
173 determination of total As accumulation in lentil's pods from soil samples.

### 174 **2.3. Mitigation of arsenic through mycorrhizal inoculation**

#### 175 **Selection of lentil genotypes**

176           Based on the pervious field experiments, BARI Mashur 1 and BARI Mashur 5 were  
177 selected for the mitigation of As uptake through mycorrhizal inoculation. These pot  
178 experiments were conducted in a green house with a controlled environment at BSMRAU.

### 179 **Collection of Arbuscular Mycorrhizal Fungus (AMF)**

180           AMF samples were collected from International Culture Collection of (Vesicular)  
181 Arbuscular Mycorrhizal Fungi (INVAM), West Virginia University (WV), USA. AMF  
182 samples were mixed with soils and roots of the host plant of Sorghum that was housed in the  
183 Department of Environmental Science at BSMRAU. Mixture of soil and roots were collected  
184 from this cultured area as a source of AMF. Finally, this mixture of AMF was used for the  
185 reduction of As uptake in lentil roots, and shoots.

### 186 **Observation of mycorrhizal spores and root colonization**

187           Mycorrhizal spores in soil were extracted by following the Wet Sieving and  
188 Decanting Method (Gerdemann and Nicolson, 1963). Soil samples were collected from  
189 rhizosphere of Sorghum and mixed thoroughly. Unwanted particles such as stones, roots, and  
190 twigs were removed from these samples as needed. From this mixture, 100 g of soil samples  
191 were kept in a bucket with three quarters of tap water (~8 Liter). This mixture was stirred  
192 vigorously by hand and washed into a bucket and left to settle for one minute. This  
193 suspension was sieved by 400  $\mu\text{m}$  and 200 $\mu\text{m}$  mesh throughout the experiment. Next,  
194 collected samples were poured through a 100 $\mu\text{m}$  sieve into a second bucket (10 liters) to  
195 avoid the loss of useful materials. After suspension settled for one minute, the supernatant  
196 was decanted using a 400- $\mu\text{m}$  sieve and the water was discarded. The solution with spores  
197 was distributed into 4 equal size test tubes using water for equal weight. The tubes were  
198 plugged properly and then centrifuged for 4 minutes at 3,000 rpm. The supernatant was then  
199 poured in the test tubes, filled with sucrose solution, and stirred vigorously with the round-



200 ended spatula re-suspended precipitate. The plugged test tubes were then centrifuged for 15  
201 seconds at 3,000 rpm. After centrifugation, the sucrose supernatant was poured through a  
202 400 $\mu$ m sieve and rapidly washed with water to remove the sucrose from AMF spores by back  
203 washing the materials from the sieve into a wash glass for observation. The spores in the  
204 wash glass were observed under Stereomicroscope and transferred to microscope slides. Then  
205 the slide placed under an electron -microscope for the observation of their size. **Similarly**, the  
206 sorghum root was rinsed thoroughly in water and cut into small pieces, then placed in 2.5%  
207 KOH solution. Roots were then heated in a water bath at 90 $^{\circ}$ c for 10-30 minutes and kept in  
208 1% HCl solution overnight. Then samples were stained in acidic glycerol with 0.05% aniline  
209 blue for 10-30 minutes at 90 $^{\circ}$ c. The de-stained samples were left at room temperature in  
210 acidic glycerol. Similarly, the roots were kept on the slides and observed under an electron  
211 microscope for the observation of spores' size, and its attachment with mycelia and hyphae  
212 (Giovanetti and Mosse, 1980) (**Figure 1**).

### 213 **Growing media, green house and sowing time of lentil genotypes**

214 Soils took as growing media for lentil plants in pot experiments. 1200g ground soils  
215 kept in each pot for growing lentil. Recommended doses of fertilizers such as, Urea, TSP and  
216 MOP were applied to each pot, as in previous experiments. BARI Mashur 1 and BARI  
217 Mashur 5 was sown on 13<sup>th</sup> April 2016 in a controlled temperature greenhouse at BSMRAU.  
218 Temperatures ranged from 18 $^{\circ}$ C to 20 $^{\circ}$ C in the greenhouse for lentil growing in pot  
219 experiments.

### 220 **Treatments and replications**

221 Two genotypes- BARI Mashur 1 and BARI Mashur 5 were selected and treatments  
222 were  $T_1 = 8 \text{ mgkg}^{-1}$  arsenic concentration in soils, and  $T_2 = 45 \text{ mgkg}^{-1}$  arsenic concentrated  
223 soils. For  $T_2$ , arsenic concentration increased from 8  $\text{mgkg}^{-1}$  to 45  $\text{mgkg}^{-1}$  from the source of

224 sodium arsenite ( $\text{AsNaO}_2$ ). A 150 g of soil with root mixture as Arbuscular Mycorrhizal  
225 Fungus (AMF) used for the mitigation of arsenic. Five replications were followed in both  
226 AMF and non-AMF treated soils. This experiment was produced total 40 pots for AMF and  
227 non-AMF applied soils.

#### 228 **Shoot length, fresh and dry weight of root and shoot**

229 Randomly, average shoot length measured through measuring tape (cm) at week 4 in  
230 each treated pots. During this week, five lentil plants harvested from arsenic treated each pot.  
231 Average fresh weight of root and shoot taken separately through an electrical balance (g) in  
232 AMF and non-AMF treated experiment. Similarly, average dry weight of root and shoot of  
233 lentil plants measured independently during this week. All samples were dried in an oven at  
234  $55^\circ\text{C}$  for 72 hours towards the digestion of samples for the determination of total As  
235 accumulation in root and shoot of lentil crops from AMF and non AMF soils.

#### 236 **2.4. Digestion of samples**

237 Soils, lentil roots, shoots and pods were digested separately following heating block  
238 digestion procedure (Rahman et al., 2007). Of the soil/compost samples, 0.2 g taken into  
239 clean, dry digestion tubes and 5 ml of concentrate  $\text{HNO}_3$  and 3 ml concentrate  $\text{HClO}_4$  added  
240 to it. The mixture was allowed to stand overnight under fume hood. In the following day, this  
241 vessel put into digestion block for 4 hours at  $120^\circ\text{C}$  temperature. Similarly, 0.2 g ground  
242 root, shoot and pod samples put into clean digestion vessel and 5 ml concentrate  $\text{HNO}_3$  added  
243 to it. The mixture was allowed to stand overnight under fume hood. In the following day, this  
244 vessel put into digestion block for 1 hours at  $120^\circ\text{C}$  temperature. This content cooled and 3  
245 ml  $\text{HClO}_4$  added to it. Again, samples put into the heating block for 3-4 hours at  $140^\circ\text{C}$ .  
246 Generally heating stopped whenever a white dense fume of  $\text{HClO}_4$  emitted into air. Then  
247 samples cooled, diluted to 25ml with de-ionized water and filtered through Whiteman No 42

248 filter paper for soil and plant samples. Finally, samples were stored with polyethylene bottles.  
249 Prior to samples digestion, all glassware was washed with 2% HNO<sub>3</sub> followed by rinsing  
250 with de-ionized water and drying.

## 251 **2.5. Analysis of total arsenic**

252 Digested samples were brought into the laboratory of Bangladesh Council of  
253 Scientific and Industrial Research (BCSIR) for the analysis of total As in lentil root, shoot,  
254 pod, soil, vermi-compost and irrigation water. The total As in root, shoot, pod of lentil plants,  
255 soil, vermi-compost and water samples were analyzed by flow injection hydride generation  
256 atomic absorption spectrophotometry (FI-HG-AAS, Perkin Elmer A Analyst 400) using  
257 external calibration (Welsch et al., 1990). The optimum HCl concentration was 10% v/v and  
258 0.4% NaBH<sub>4</sub> produced the maximum sensitivity. Three replicates taken from each digested  
259 samples and the mean values obtained based on the calculation of those three replicates.  
260 Standard Reference Materials (SRM) from National Institute of Standards and Technology  
261 (NIST), USA analyzed in the same procedure at the start, during and at the end of the  
262 measurements to ensure continued accuracy.

## 263 **2.6. Statistical Analysis**

264 The design of this experiment was followed Completely Randomized Block (CRD).  
265 Analysis of Variance (ANOVA), means comparison of treatment, varieties, interaction  
266 between treatment and varieties, treatment and soils, varieties and soils, treatment- varieties  
267 and soils on arsenic accumulation in lentil roots, shoots and pods were analyzed using  
268 software R.

## 269 **3. RESULTS**

### 270 **3.1 Chemical properties of lentil seed, soil and water samples**

271 The ranges of dry weight of lentil seeds were 9.43 to 9.53 g of 10g BARI released  
272 lentil genotypes. Among all lentil cultivars, BARI Mashur 1, BARI Mashur 5, BARI Mashur  
273 6, and BARI Mashur 7 seeds were found As free. The highest As concentration ( $0.05\text{mgkg}^{-1}$ )  
274 was found in the seeds of BARI Mashur 4. The distilled water was As free as well as 0.02  
275  $\text{mgL}^{-1}$  concentrated arsenic were present in irrigation water. The ranges of pH found 6.75 to  
276 7.93 in vermi-compost, BSMRAU, BJRI and Mathchar soils. The total nitrogen, available  
277 phosphorus, exchangeable potassium, and available sulfur were detected 1.23%, 57.71, 150  
278 and 698.04  $\text{mgkg}^{-1}$  in vermi-compost samples, accordingly. As well, the total nitrogen,  
279 available phosphorus, exchangeable potassium, and available sulfur were detected 0.057%,  
280 14.41, 120 and 9.615  $\text{mgkg}^{-1}$  in BJRI soil samples, separately. Similarly, in BSMRAU soil  
281 samples, the total nitrogen, available phosphorus, exchangeable potassium, and available  
282 sulfur were found 0.11%, 20.68, 124 and 23.07  $\text{mgkg}^{-1}$ , respectively. On the other hand,  
283 Mathchar soil samples content 0.086% of total nitrogen, 9.177  $\text{mgkg}^{-1}$  available phosphorus,  
284 128  $\text{mgkg}^{-1}$  exchangeable potassium, and 2.884  $\text{mgkg}^{-1}$  available sulfur. Total As  
285 concentration found 2.688, 8.299, 5.223, and 14.633  $\text{mgkg}^{-1}$  in vermi-compost, BJRI,  
286 BSMRAU, and Mathchar soil samples, respectively (Table 1).

### 287 **3.2 Biomass and arsenic accumulation in root, shoot and pod of lentil genotypes**

#### 288 **Shoot length, fresh weight and dry weight of root and shoot of lentil varieties**

289 The highest average shoot length of BARI Mashur 2, BARI Mashur 2 &3, and BARI  
290 Mashur 3 were found 12.5, 11.4, and 9.8 (cm) in  $T_1$ ,  $T_2$  and  $T_3$  treated lentil seedlings at week  
291 3.  $T_3$  treated shoot length of BARI Mashur 6 lentil were found significantly lower ( $p < 0.001$ )  
292 than other lentil seedlings (Figure 2). The fresh weight (0.182-0.20 g) was not significantly  
293 increased ( $p < 0.001$ ) in  $T_3$  treated Lentil seedlings. The lowest fresh weight 0.189g was found  
294 in  $T_3$  treated BARI Mashur 5 lentil seedlings at week 3 (Figure 3). In week 9, the ranges of

295 dry weight of root and shoot was found 0.4384 to 0.9064 (g) in As treated lentil seedlings.  
296 The highest dry weight of root and shoot were 0.8612 (g) found in BARI Mashur 1 in T<sub>2</sub>  
297 treated seedlings. The lowest was 0.4154 (g) in BARI Mashur 4 of T<sub>2</sub> treated seedlings.  
298 Similarly, the ranges of dry weight of root and shoot were 0.112 to 0.234 (g) in T<sub>3</sub> treated  
299 seedlings. Dry weight of root and shoot were recorded comparatively lower in T<sub>3</sub> treated  
300 lentil seedling than T<sub>1</sub> and T<sub>2</sub>. Dry weight of root in T<sub>3</sub> treated BARI Mashur 5 lentil  
301 genotypes were found significantly different. As well, Dry weight of shoot in BARI Mashur 7  
302 were found significantly higher than BARI Mashur 1, 2, 4, 5 and 6 lentil genotypes at week 9  
303 (Figures 4, and 5).

#### 304 **Arsenic uptake in root and shoot of lentil varieties**

305 According to ANOVA, treatments on arsenic accumulation in root and shoot were  
306 found statistically significant ( $p < 0.001$ ). Varieties, and interaction of varieties and treatments  
307 both were significantly different on As uptake in lentil roots ( $p < 0.001$ ) (Table 2). Mean  
308 comparison of treatment 1 & 2 ( $0.001 \leq p < 0.01$ ), 1 & 3 ( $p < 0.001$ ), and 2 & 3 ( $p < 0.001$ ) for  
309 As accumulation in roots were found significantly difference. As well, the mean comparison  
310 of treatment 1 & 3 and treatment 2 & 3 both were found significantly identical ( $p < 0.001$ ) on  
311 As accumulation in lentil shoot (Table 3). Interaction of BARI Mashur 1&3 ( $0.01 \leq p < 0.05$ ),  
312 BARI Mashur1 & 4 ( $0.05 \leq p < 0.0.1$ ), BARI Mashur1 & 5 ( $0.001 \leq p < 0.01$ ), BARI Mashur1 & 6  
313 ( $0.01 \leq p < 0.05$ ), BARI Mashur 2 & 3 ( $p < 0.001$ ), BARI Mashur 2 & 4 ( $0.001 \leq p < 0.01$ ), BARI  
314 Mashur 2 & 5 ( $p < 0.001$ ), BARI Mashur 2 & 6 ( $0.001 \leq p < 0.01$ ), and BARI Mashur 2 & 7  
315 ( $0.01 \leq p < 0.05$ ) were found statistically significant on As accumulation in their roots (Table  
316 3). The mean comparison of the interaction between treatments (3) and lentil varieties (7) on  
317 As accumulation in root were found statistically significant ( $p < 0.001$ ,  $0.001 \leq p < 0.01$ ,  
318  $0.01 \leq p < 0.05$ ) difference (Table 4).

### 319 **Arsenic accumulation in pod of lentil varieties during field condition**

320 The collected of BARI released seven lentil varieties were cultivated in 5 mg/kg As  
321 concentrated field soils. Among these varieties, BARI Mashur 1 was the highest arsenic (0.45  
322 mgkg<sup>-1</sup>) accumulator and the lowest As (0.029 mgkg<sup>-1</sup>) accumulator was BARI Mashur 7 in  
323 its pod. An average As concentration found 0.237, 0.133, 0.298, 0.17, and 0.262 mgkg<sup>-1</sup> in  
324 pods of BARI Mashur 2, BARI Mashur 3, BARI Mashur 4, BARI Mashur 5, and BARI  
325 Mashur 6, respectively. Arsenic was significantly increased in pods of BARI Mashur 1 lentil  
326 in compare to other genotypes (Figure 6).

### 327 **3.3 Mitigation of arsenic uptake in root and shoot of lentil**

#### 328 **Spore size of Arbuscular Mycorrhizal Fungus (AMF) in roots and soils**

329 The spore, mycelia and hyphae of AMF observed through stereomicroscope in soil  
330 and root samples separately. Sizes of spores were 1-1.7 mm in root samples. On the other  
331 hand, spore size of AMF 1.3- 1.7 mm was in soil samples. Spore colonization was found 70%  
332 in root samples. Number of spore was detected 140 of each kg soil sample (Figure 1).

#### 333 **Biomass of lentil genotypes at non-AMF and AMF applied soils**

334 In Non- AMF soils, shoot length of BARI Mashur 1 and BARI Mashur 5 were 6.8 and  
335 6.2 cm in T<sub>1</sub> treated lentil seedlings. Shoot, length was 5.8, and 3.8 cm were in BARI Mashur  
336 1, and BARI Mashur 5 at T<sub>2</sub> treated seedlings. AMF treated shoot length at 8 mgkg<sup>-1</sup> and 45  
337 mgkg<sup>-1</sup> arsenic concentrated both soils were found significantly higher than non AMF soils  
338 during week 4 (Figure 7). Fresh and dry weight of shoot both were found significantly lower  
339 in non-AMF treated 45 mgkg<sup>-1</sup> arsenic concentrated soils at week 5 (Figure 8 and 9). As well  
340 as, AMF has significant effect for the increasing of dry and fresh weight of roots in lentil  
341 genotypes (Figure 10 and 11).

## 342 **Reduction of arsenic uptake in root and shoot of lentil genotypes**

343 **According to ANOVA**, arsenic accumulation in root and shoot of BARI Mashur 1  
344 and BARI Mashur 5 lentils at non-AMF soils were found significantly difference ( $p<0.001$ ).  
345 As well as, arsenic uptake is significantly reduced in root and shoot of lentil genotypes at  
346 AMF treated soils (**Table 5**). The interaction between treatment & soils on the reduction of  
347 As uptake in lentil root and shoot were found statistically significant ( $p<0.001$ ) (**Table 6**).  
348 Mean comparison effect of the interaction between treatment  $T_2$  & AMF soils and  $T_2$  & non  
349 AMF soils on the reduction of arsenic accumulation in root and shoot of BARI Mashur 1 and  
350 5 were found statistically significant ( $p<0.001$ ) (**Table 7**).

351 Treatment, variety, and treatment & varietal interaction effect in root and shoot at  
352 AMF and non AMF soil were found statistically significant ( $p<0.001$ ) (**Table 8**). Mean  
353 comparison effect of the interaction between  $T_2$  & BARI Mashur 1 and  $T_1$  & BARI Mashur 1;  
354  $T_2$  & BARI Mashur 5 and  $T_1$  & BARI Mashur 1;  $T_1$  & BARI Mashur 5 and  $T_2$  & BARI  
355 Mashur 1;  $T_2$  & BARI Mashur 5 and  $T_2$  & BARI Mashur 1; and  $T_2$  & BARI Mashur 5 and  $T_1$   
356 & BARI Mashur 5 ( $p<0.001$ ) were found statistically significant difference on As  
357 accumulation in their root and shoot at non-AMF soils. As well as, in AMF soils, arsenic  
358 accumulation was significantly reduced ( $p<0.001$ ) in their root and shoot of both lentil  
359 varieties (**Table 9**).

360 According to ANOVA, treatment, variety, soil, treatment & varietal interaction, and  
361 treatment & soil interaction effect in root and shoot of lentil plants were found statistically  
362 significant ( $p<0.001$ ). On the other hand, the interaction between variety & soil; treatment,  
363 variety and soil were found statistically significant difference ( $p<0.001$ ) in shoot (**Table 10**).  
364 According to the interaction between treatment and soils, mean comparison effect of the  
365 interaction between  $T_2$  & AMF and  $T_2$  & non-AMF soils on the reduction of As uptake in

366 root and shoot of both lentil crops were found statistically significant ( $p < 0.001$ ) (Table 11).

367 According to the interaction between variety and soils, means comparison of the interaction

368 effect of BARI Mashur 5 & AMF and BARI Mashur 5 & non- AMF soils on the reduction of

369 As uptake in lentil shoot in this pot experiment were found to be statistically significant

370  $p < 0.001$ ) (Table 11). Also, interaction effect between treatment, variety and soil, on the

371 reduction of As uptake in shoot of lentil crops were found statistically significant difference

372 ( $p < 0.001$ ;  $0.001 \leq p < 0.01$ ) (Table 12).

### 373 3. Discussion

374 Arsenic (As) contamination in soils has been reported in many countries throughout

375 the world, with the most severe problems found in Asia, particularly Bangladesh (Chowdhury

376 et al., 1999; Dhar et al., 1997). In Bangladesh, the contamination of As in groundwater was

377 confirmed in 1993 (Tondel et al., 1999). Since then, this contamination has been extended to

378 crop fields due to the irrigation of ground water in Bangladesh (Alam et al., 2011; Tondel et

379 al., 1999). Among several contaminated areas, Faridpur region is one of the highest As

380 contaminated in Bangladesh. Most of these areas are As polluted due to highly uses of ground

381 water irrigation in their crop fields. We found about 15 mg/kg concentrated of arsenic in

382 background soils of these regions, this concentration is definitely dangerous for the

383 development of root, shoot and grains for many cereal crops as well as lentil plants (Table 1).

384 Similarly, As contamination in food crops is also highly visible in other region of Bangladesh

385 including west India (Ullah, 1998; Alam and Sattar, 2000).

386 Lentil is one of the important leguminous food crops as well as rice and other minor

387 cereal crops in Bangladesh. Plant's protein is significantly essential for physiological growth

388 of human beings. Nevertheless, these food crops have contaminated because of high

389 concentrated As presence in soils of crop fields. Generally, lentil grown in dry season, so

390 irrigation needed for successful cultivation of this crop. Arsenic in background soils and



391 water lead to elevate the concentration of As in lentil root, shoot and grain (Ahmed et al.,  
392 2006). These type of uptake in root, shoot and pod of lentil crops is connected with several  
393 nutrient in soils specially phosphate content in soils (Ahmed et al., 2006; Hingston et al.,  
394 1972). We found phosphorus concentration ( $9- 57 \text{ mgkg}^{-1}$ ) in soil samples for pot experiment,  
395 which increased the As accumulation in lentil root, shoot and pods (Table 1).

396 Arsenic accumulation in lentil genotypes has significantly affected on its biomass.  
397 Different vegetative responses of lentil plants such as root length, shoot height, root and shoot  
398 biomass had studied in this experiment (Figure 3 and 4). Kapustka et al. (1995) reports the  
399 sensitivity of vegetative response follows the order: root length>root mass>shoot length>total  
400 mass (root + shoot)>shoot mass>germination. However, we found As sensitivity was higher  
401 on lentil's roots, shoots, and pods, accordingly. Shoot, height, fresh weight, dry weight of  
402 root and shoots, plant biomass (root + shoot + pod) and root length were significantly  
403 affected with increasing of As concentration in soils. For instance, total biomass of lentil  
404 crops was found to be in more jeopardy in  $100 \text{ mgkg}^{-1}$  As concentrated soils than other  
405 treated pots ( $5 \text{ mgkg}^{-1}$  As;  $15 \text{ mg kg}^{-1}$  As) of lentil seedlings (Figures 3, 4, and 5).

406 BARI released all lentil are promising varieties in Bangladesh as well as throughout  
407 the world. Not yet conducted of an experiment against As uptake from soil to root, shoot and  
408 grain in lentil of Bangladesh. In fact, Bangladesh is the second largest As contaminated  
409 region throughout the world. In addition, lentil is the number one pulse crops as a source of  
410 protein. Humans need more protein for the proper development of their immune system. In  
411 this regards, lentil is also one of the cheapest sources of protein for the effort on mental  
412 development. This protein should be toxin free and healthy to consume for human beings.  
413 However, all lentil varieties were performed with significant differences for the accumulation  
414 of As in their roots in  $5, 15$  and  $100 \text{ mgkg}^{-1}$  concentrated soils due to the less genotypic  
415 variation. Nevertheless, As accumulation is not significantly increased in shoots and pods of

416 lentil plants. We found all lentil varieties were grown in good condition during seedling stage  
417 in 5 and 15 mgkg<sup>-1</sup> arsenic concentrated soils compare to the 100mgkg<sup>-1</sup> concentrated soils  
418 (Figures 3, 4, and 5).

419 This is good news that not significant concentration of As has transported from soils  
420 to lentil pods (Table 5). In fact, BARI Mashur 1 genotypes were identified higher As  
421 accumulator (0.45 mgkg<sup>-1</sup>) in pods than other genotypes (Figure 6). Similarly, irrespective of  
422 As dose, roots contained higher concentration of As than shoots and pods. Higher As  
423 concentration in roots reported by Marin et al. (1992, 1993), Xie and Huang (1998) and  
424 Abedin et al. (2002) in food crops. There are, however, no previous reports of elevated As  
425 concentrations in lentil pods. This research has significant importance in terms of human food  
426 chain. Lentil pods, root and shoot are highly used as food for humans, and animals  
427 throughout the world. Arsenic might have been transferred to human bodies through the food  
428 chains. This transportation is conditional on the availability of As in soils from its source. It  
429 has carcinogenic effect in the Bengal Delta Plain is considered to be the largest mass  
430 poisoning in the history of humanity as millions of people are exposed and suffer the effects  
431 of chronic As intoxication (Smith et al., 2008). Arsenic has identified as a non-threshold  
432 human carcinogen (International Agency for Cancer Research [IARC], 2004). Furthermore,  
433 other than cancer, human exposure to As has been associated to diverse health problems such  
434 as cardiovascular disease, skin lesions, and diabetes (World Health Organization [WHO],  
435 2011). The concentration of As in the groundwater in Bangladesh and West Bengal (India)  
436 exceeds by several times the permissible levels set internationally and nationally (Chakraborti  
437 et al., 2009; Mandal and Suzuki, 2002). Due to the critical situation, arsenic free lentil  
438 grains/pods are significantly important in the South Asian network as well as all over the  
439 world.

440 In these circumstances, low As accumulator lentil genotypes are important for human  
441 beings. For this mitigation of arsenic, AMF can reduce the As uptake in root, shoot and pods  
442 of lentil crops (Orlowska et al., 2012). This AMF colonized with lentil roots, which is  
443 deterred As uptake and As toxicity through the symbiosis relationship between each other. It  
444 is consistently enhanced the reduction of As toxicity, and plants generally show increases in  
445 growth compared with Non-AMF controls grown at the same As and P supplies in soil  
446 (Ahmed et al., 2006; Covey et al., 1981; Pope et al., 2007; Ultra et al., 2007b; Xia et al.,  
447 2007). We found BARI Mashur 1 and BARI Mashur 5 both lentil genotypes performed better  
448 for their growth of root and shoots in 8 mgkg<sup>-1</sup> and 45 mgkg<sup>-1</sup> arsenic concentrated AMF  
449 applied soils than non-AMF. We also found shoot length, dry weight of shoot and root, fresh  
450 weight of root and shoot of lentil were higher in AMF treated soil than non- AMF applied  
451 soils. Root and shoot, growth was satisfactory of both varieties of lentil in mutually treated of  
452 AMF applied soils (Figure 7- 11).

453 Arsenic has increased significantly in root and shoot of BARI Mashur 1 and BARI  
454 Mashur 5 of lentil genotypes. There is also evidence AMF can reduce As uptake in root and  
455 shoot in both lentil genotypes (Table 7 and 8). Research also showed that AMF have their  
456 substantial effect on plant growth. The growth parameters decreased significantly with the  
457 increase rate of As concentration in soils. It emphasized that AMF inoculation reduced As  
458 translocation from soil to plant and increase growth and nutrient uptake and chlorophyll  
459 content of food crops significantly (Elahi et al., 2010). Similarly, there is growing evidence  
460 that Mycorrhizal fungi might alleviate As toxicity to the host plant by acting as a barrier in  
461 soils (Leyval et al. 1997). It has been widely reported that mycorrhizas fungi can increase the  
462 tolerance of their host plants to heavy metals when present at toxic levels (Bradley et al.,  
463 1982; Jones and Hutchinson 1988). Heggo and Angle (1990) and Hetrick et al. (1994) as well

464 as demonstrated that, at high level of As concentration in soils, AMF infection reduced the  
465 concentration of As in plant biomass.

466 Plant growth changes due to the presence of toxic substances and availability of  
467 nutrient in soils. Arsenic toxicity is one of the important factors for the nutrient availability in  
468 soils, which directly deterred to stunt of plant growth. For this, we need to improve soil  
469 health condition through the mitigation process of arsenic toxicity in soils. As a reason, we  
470 used AMF for the improvement of soil condition through the mitigation of arsenic toxicity in  
471 soils. There is also evidence AMF can be effective in 8 and 45 mgkg<sup>-1</sup> arsenic concentrated  
472 soils for the reduction of arsenic uptake in root and shoot from soils (Table 11 and 12).  
473 Similar result also found that AMF play an important role in protecting crop plants against As  
474 contamination. However, this is the direct involvement of arbuscular mycorrhizal fungi  
475 (AMF) in detoxification mechanisms. AMF treated soils indicate that fungal colonization  
476 dramatically increased plant's biomass growth (Chen et al., 2007). Research demonstrate a  
477 positive effect of mycorrhizal inoculation on growth of lentil (*L. culinaris*), P nutrition, and  
478 lessens As toxicity in plant soil interaction (Chen et al., 2007). It can reduce into human  
479 body through food chains using AMF inoculation in As contaminated soils. Reduced uptake  
480 of As by lentil roots and subsequently, transformation to shoots and pods, has particularly  
481 will not be implicated to the human food chain.

#### 482 **4. Conclusion**

483 Arsenic is the number one carcinogenic substances. Among 37 countries,  
484 Bangladesh is one of the second largest arsenic contaminated areas in the world. Not only  
485 Bangladesh, many countries has identified As is the toxic and hazardous substances.  
486 Lentil is one of the important legume crops in Bangladesh as well as throughout the world  
487 as a source of protein. This source of protein should have confirmed toxin free for human

488 beings. For this reason, accumulation of As and its mitigation in lentil genotypes is  
489 significantly important for the future demand of food safety. We found BARI Mashur 1  
490 lentil genotypes high As accumulator than other released lentil varieties in Bangladesh.  
491 AMF applied for the mitigation of As from soils to root, shoot and pods in these lentil  
492 genotypes. We found AMF could effectively reduce As transportation from soil to root  
493 and shoot of lentil seedlings. It also diagnosed that AMF has decreased As uptake in root  
494 and shoot of lentil crops. Therefore, the mitigation of As in lentil root, shoot and pod is  
495 significantly important for the supplying of toxin free lentil seeds throughout the world  
496 using AMF in soils.

#### 497 **Conflict of interest**

498 Authors declare that no conflict of interests exists regarding the publication of this  
499 paper.

#### 500 **Acknowledgement**

501 Authors are grateful to the laboratory of Crop and Soil Sciences at **Washington State**  
502 **University, WA, USA for their research support**. The authors also thank to the Laboratory  
503 of Environmental Science at BSMRAU, soil science at BAU and Biological Research  
504 Division at Soil and Environment Section of BCSIR. Finally, we are especially thankful to  
505 the ASPADA for their valuable funding on behalf of this research project.

#### 506 **References**

507 Abedin, M. J., Cotter-Howells, J. and Meharg, A. A. (2002). Arsenic uptake and  
508 accumulation in rice (*Oryza sativa* L.) irrigated with contaminated water. *Plant Soil*,  
509 240, 311–319.

- 510 Ahmed, F. R. S., Alexander, I. J., Mwinyihija, M. and Killham, K. (2011). Effect of  
511 superphosphate and arbuscular mycorrhizal fungus *Glomus mosseae* on phosphorus and  
512 arsenic uptake in Lentil (*Lens culinaris* L.). *Water Air Soil Pollution*, 221, 169–182.
- 513 Ahmed, F. R. S., Killham, K. and Alexander, I. (2006). Influences of arbuscular mycorrhizal  
514 fungus *Glomus mosseae* on growth and nutrition of lentil irrigated with arsenic  
515 contaminated water. *Plant and Soil*, 258, 33–41.
- 516 Alam, M. B. and Sattar, M. A. (2000). Assessment of arsenic contamination in soils and  
517 waters in some areas of Bangladesh. *Water Sci. Tech.*, 42, 185–193.
- 518 Alam, M. Z., Ali, M. P., Al-Harbi N. A. and Choudhury, T. R. (2011). Contamination status  
519 of arsenic, lead, and cadmium of different wetland waters. *Toxicological &*  
520 *Environmental Chemistry*, 93, 10, 1934-1945.
- 521 Amini, M., Abbaspour, K.C., Berg, M., Winkel, L., Hug, S. J., Hoehn, E. Yang, H. and  
522 Johnson, C. A. (2007). Statistical modeling of global geogenic arsenic contamination in  
523 groundwater. *Environ. Sci. Technol.* xxx, xx, XXXX.
- 524 BARC (Bangladesh Agricultural Research Council). (2012). Fertilizer Recommendation  
525 Guide. Farmgate, Dhaka-1207, Bangladesh. 117, 251, 254.
- 526 Bradley, R., Burt, A. J. and Read, D. J. (1982). The biology of mycorrhiza in the Ericaceae.  
527 VIII. the role of mycorrhizal infection in heavy metal resistance. *The New Phytologist*,  
528 91, 197–209.
- 529 Chakraborti, D., Das, B., Rahman, M. M., Chowdhury, U. K., Biswas, B., Goswami, A. B.,  
530 Nayak, B., Pal, A., Sengupta, M. K., Ahamed, S., Hossain, A., Basu, G.,  
531 Roychowdhury, T. and Das, D. (2009). Status of groundwater arsenic contamination in  
532 the state of West Bengal, India: a 20-year study report. *Molecular Nutrition and Food*  
533 *Research*, 53, 542 – 551.

- 534 Chen, B., Xiao, X., Zhu, Y. G., Smith, F. A., Xie, Z. M, Smith, S. E. (2007). The arbuscular  
535 mycorrhizal fungus *Glomus mosseae* gives contradictory effects on phosphorus and  
536 arsenic acquisition by *Medicago sativa* Linn. *Sci Total Environ.*, 379, (2-3), 226-34.
- 537 Chesnin, L. and Yien, C. (1951). Turbidimetric determination of available sulfates. *Soil Sci.*  
538 *Soc. Amer. Proc.* 15, 1, 49-51.
- 539 Chowdhury, T. R., Basu, G. K., Mandal, B. K., Samanta, G., Chowdhury, U. K., Chanda, C.  
540 R., Lodh, D., Lal Roy, S., Saha, K. C., Roy, S., Quamruzzaman, Q. and Chakraborti, D.  
541 (1999). Arsenic poisoning in the Ganges delta. *Nature*, 401, 545–546.
- 542 Covey, R. P., Koch, B.L. and Larsen, H. J. (1981) Influence of vesicular arbuscular  
543 mycorrhizae on the growth of apple and corn in low-phosphorous soil. *Phytopathology*,  
544 71, 712–715.
- 545 Cubadda, F., Ciardullo, S., D'amato, M., Raggi, A., Aureli, F., and Carcea, M. (2010).  
546 Arsenic contamination of the environment-food chain: a survey on wheat as a test plant  
547 to investigate phytoavailable arsenic in Italian agricultural soils and as a source of  
548 inorganic arsenic in the diet. *J. Agric. Food Chem.*, 58, 10176–10183.
- 549 Cui, J., Shi, J., Jiang, G. and Jing, C. (2013). Arsenic levels and speciation from ingestion  
550 exposures to Biomarkers in Shanxi, China: implications for human health. *Environ. Sci.*  
551 *Techno.*, 47, 5419–5424.
- 552 Dhar, R. K., Biswas, B. K., Samanta, G., Mandal, B. K., Chakraborti, D., Roy, S., Jafar, A.,  
553 Islam, A., Ara, G., Kabir, S., Khan, A. W., Ahmed, S. A. and Hadi, S. A. (1997).  
554 Groundwater arsenic calamity in Bangladesh. *Curr. Sci.* 73, 48–59.
- 555 Elahi, F. E., Aminuzzaman, F. M., Mridha, M. A. U., Begum, B. and Harun, A. K. M. Y.  
556 (2010). AMF Inoculation Reduced Arsenic Toxicity and Increased Growth, Nutrient

- 557 Uptake and Chlorophyll Content of Tomato Grown in Arsenic Amended Soil.  
558 *Advances in Environmental Biology*, 4, 2, 194-200.
- 559 Gerdemann, J. W. and Nicolson, T. H. (1963). Species of mycorrhizal endogone species  
560 extracted from soil by wet sieving and decanting method. *Trans. Brit. Mycol. Soc.*, 46,  
561 235-246.
- 562 Giovanetti, M. and Mosse, B. (1980). An evaluation of techniques for measuring vesicular  
563 mycorrhizal infection in roots. *New Phytologist*, 97, 447-453.
- 564 Guillon, F. and Champ, M. M. (2002). Carbohydrate fractions of legumes: uses  
565 in human nutrition and potential for health. *British Journal of Nutrition*, 88, S3, 293-  
566 306.
- 567 Hamilton, E. I. (2000). Environmental variables in a holistic evaluation of land contaminated  
568 by historic mine wastes: a study of multi-element mine wastes in West Devon, England  
569 using arsenic as an element of potential concern to human health. *Science of the Total*  
570 *Environment*, 249, 1, 171-221.
- 571 Heggo, A. and Angle, J. S. (1990). Effects of vesicular-arbuscular mycorrhizal fungi on  
572 heavy metal uptake by soybeans. *Soil Biology and Biochemistry*, 22, 856–869
- 573 Heikens, A. (2006). Arsenic contamination of irrigation water, soil and crops in Bangladesh:  
574 risk implications for sustainable agriculture and food safety in Asia. Retrieved  
575 <http://www.fao.org/docrep/009/ag105e/ag105e00.htm>
- 576 Hetrick, B. A. D., Wilson, G. W. T. and Figge, D. A. H. (1994). The influence of mycorrhizal  
577 symbiosis and fertilizer amendments on establishment of vegetation in heavy metal  
578 mine spoil. *Environmental Pollution*, 86, 171–179.
- 579 Hingston, F. J., Posner, A. M. and Quirk, J. P. (1972). Competitive adsorption of negatively  
580 charged ligands on oxide surfaces. *Faraday Discuss. Chem. Soc.*, 52, 334–342.



- 581 Hossain, M. F. (2006). Arsenic contamination in Bangladesh-An overview. *Agriculture,*  
582 *Ecosystems and Environment*, 113, 1–16.
- 583 IARC (International Agency for Cancer Research). (2004). Some Drinking-Water  
584 Disinfectants and Contaminants, Including Arsenic. IARC Monograph on the  
585 Evaluation of Carcinogenic Risk to Human. Available in,  
586 <http://monographs.iarc.fr/ENG/Monographs/vol84/mono84.pdf>. Accessed 7 October,  
587 2016.
- 588 Jackson, M. L. (1973). *Soil Chemical Analysis*. Prentice Hall, New Delhi, India
- 589 Jones, M. D. and Hutchinson, T. C. (1988). Nickel toxicity in mycorrhizal birch seedlings  
590 infected with *Lactarius rufus* or *Scleroderma flavidium*. 2. Uptake of nickel, calcium,  
591 magnesium, phosphorus and iron. *The New Phytologist*, 108, 461–470
- 592 Kapustka, L. A., Lipton, J., Galbraith, H., Cacela, D. and Lejeune, K. (1995). Metallic and  
593 arsenic impacts to soils, vegetation communities and wildlife habitat in southwest  
594 Montana uplands contained by smelter emissions: II. Laboratory phytotoxicity studies.  
595 *Environ. Toxicol. Chem.*, 14, 1905–1912.
- 596 Leung, H. M., Leung, A. O. W., Ye, Z. H., Cheung, K. C. and Yung, K. K. L. (2013). Mixed  
597 arbuscular mycorrhizal (AM) fungal application to improve growth and arsenic  
598 accumulation of *Pteris vittata* (As hyperaccumulator) grown in As-contaminated soil.  
599 *Chemosphere*, 92, 1367-1374.
- 600 Leyval, C., Turnau, K., and Haselwandter, K. (1997). Effect of heavy metal pollution on  
601 mycorrhizal colonization and function: Physiological, ecological and applied aspects.  
602 *Mycorrhiza*, 7, 139–153
- 603 Liao, X., Fu, Y., He, Y. and Yang, Y. (2014). Occurrence of arsenic in fruit of mango plant  
604 (*Mangifera indica* L.) and its relationship to soil properties. *Catena*, 113, 213–218.

- 605 López-Rayó, S., Laursen, K. H., Lekfeldt, J. D. S., Delle, G. F. and Magid, J. (2016). Long-  
606 term amendment of urban and animal wastes equivalent to more than 100 years of  
607 application had minimal effect on plant uptake of potentially toxic elements  
608 Agriculture. *Ecosystems and Environment*, 231, 44-53.
- 609 Mandal, B. K. and Suzuki, K. T. (2002). Arsenic round the world :a review. *Talanta*, 58, 201-  
610 235.
- 611 Marin, A. R., Masscheleyn, P. H. and Patrick, W. H. Jr. (1992). The influence of chemical  
612 form and concentration of arsenic of rice growth and tissue arsenic concentration. *Plant*  
613 *Soil*, 139, 175–183.
- 614 Marin, A. R., Masscheleyn, P. H. and Patrick. (1993). Soil-pH of arsenic species and its  
615 influence by uptake by rice. *Plant Soil*, 152, 245–253.
- 616 Nagajyoti, P. C., Lee, K. D. and Sreekanth, T. V. M. (2010). Heavy metals, occurrence and  
617 toxicity for plants: a review. *Environmental Chemistry Letters*, 8, 3, 199–216.
- 618 Ntebogeng, S., Matlala, M., Tavizon, E. F., Michel, H. C., Videa, J. R. P. and Torresdey, J. L.  
619 G. (2008). Toxicity of arsenic (III) and (V) on plant growth, element uptake and total  
620 amylolytic activity of mesquite (*Prosopis juliflora xp. velutina*). *International Journal*  
621 *of Phytoremediation*, 10, 47–60.
- 622 Olsen, S. R. and Sommers, L. E. (1982). Phosphorus. In: Page A L, Miller R H, Keeney D R.,  
623 eds., *American Society of Agronomy*, Madison, WI, USA. 403–430.
- 624 Orłowska, E., Godzik, B., and Turnau, K. (2012). Effect of different arbuscular mycorrhizal  
625 fungal isolates on growth and arsenic accumulation in *Plantago lanceolata* L.  
626 *Environmental Pollution*, 168, 121-130.
- 627 Pope, S., Smith, S. E. and Christophersen, H. M. et al. (2007) Arsenic uptake by *Medicago*  
628 *truncatula*: P supply and arbuscular mycorrhizal (AM) colonization do not reduce

- 629 specific uptake from soil. In: Zhu YG, Lepp N, Naidu R (eds) Biogeochemistry of  
630 Trace Elements: Environmental Protection. Remediation and Human Health. Tsinghua  
631 University Press, Beijing, pp 863–864
- 632 Rahman, M. A., Hasegawa, H., Rahman, M. M., Rahman, M. A. and Miah, M. A. M. (2007).  
633 Accumulation of arsenic in tissues of rice plants (*Oryza sativa L.*) and its distribution in  
634 fraction of rice grain. *Chemosphere*, 69, 942-948.
- 635 Schneider, J., Labory, C. R. G., Rangel, W. M., Alves, E. and Guilherme, L. R. G. (2013).  
636 Anatomy and ultrastructure alterations of *Leucaena leucocephala* (Lam.) inoculated  
637 with mycorrhizal fungi in response to arsenic-contaminated soil. *Journal of Hazardous*  
638 *Materials*, 262, 1245–1258.
- 639 Singh, R., Singh, S., Parihar, P., Singh, V. P. and Prasad, S. M. (2015).  
640 Arsenic contamination, consequences and remediation techniques: A review.  
641 *Ecotoxicology and Environmental Safety*, 112, 247-270.
- 642 Smith, E., Juhasz, A. L. and Weber, J. (2008). Arsenic uptake and speciation in vegetables  
643 grown under greenhouse conditions. *Environmental Geochemistry and Health*, 31, 125-  
644 132.
- 645 Smith, S. E., Christophersen, H. M., Pope, S. and Smith, F. A. (2010). Arsenic uptake and  
646 toxicity in plants: integrating mycorrhizal influences, *Plant Soil*, 327, 1–21.
- 647 SOS. (2011). Arsenic Poisoning in Bangladesh/India. Retrieved <http://www.sos-arsenic.net>.
- 648 Tom, M., Fletcher, T. D. and Mccarthy, D. T. (2014). Heavy Metal Contamination of  
649 Vegetables Irrigated by Urban Stormwater: A Matter of Time. *PLoS ONE*, 9, 11.
- 650 Tondel, M., Rahman, M., Magnuson, A., Chowdhury, I. A., Faruquee, M. H. and Ahmed, S.  
651 A. (1999). The relationship of arsenic levels in drinking water and prevalence rate of  
652 skin lesions in Bangladesh. *Environ. Health Perspect.*, 107, 727– 729.

- 653 Toulouze, M., Pilme, J., Pauzat, F. and Ellinger, Y. (2012). Arsenic in prebiotic species: a  
654 theoretical approach. *Physical Chemistry Chemical Physics*, 14, 30, 10515-10522.
- 655 Ullah, S. M. (1998). Arsenic contamination of groundwater and irrigated soils of Bangladesh.  
656 In Abstracts: international conference of arsenic pollution of groundwater in  
657 Bangladesh: causes, effects and remedies. 8–12 February 1998, Dhaka community  
658 Hospital, Dhaka. 133 pp.
- 659 Ultra, V.U., Tanaka, S. and Sakurai, K. et al. (2007a) Arbuscular mycorrhizal fungus  
660 (*Glomus aggregatum*) influences biotransformation of arsenic in the rhizosphere of  
661 sunflower (*Helianthus annuus* L.). *Soil Sci Plant Nutr.*, 53:499–508.
- 662 Welsch, E. P., Crock, J. G. and Sanzolone, R. (1990). Trace level determination of arsenic  
663 and selenium using continuous flow hydride generation atomic absorption  
664 spectrophotometry (HG-AAS). In: Arbogast BF (ed) quality assurance manual for the  
665 branch of geochemistry. Open File Rep. 90-0668. US Geological Survey, Reston, VA.  
666 P38-45.
- 667 World Health Organization (WHO). (2011). Safety evaluation of certain contaminants in  
668 food. WHO Food Additives Series No. 63. Available:  
669 [http://whqlibdoc.who.int/publications/2011/9789241660631\\_eng.pdf](http://whqlibdoc.who.int/publications/2011/9789241660631_eng.pdf). Accessed 7  
670 October, 2016
- 671 Xia, Y. S., Chen, B. D. and Christie, P. et al. (2007) Arsenic uptake by arbuscular  
672 mycorrhizal maize (*Zea mays* L.) grown in an arsenic-contaminated soil with added  
673 phosphorus. *J Environ Sci.*, 19, 1245–1251.
- 674 Xie, Z. M. and Huang, C. Y. (1998). Control of arsenic toxicity in rice plants grown on an  
675 arsenic-polluted paddy soil. *Commun. Soil Sci. Plant Anal.* 29, 2471–2477.

676 Zheng, S. and Kahn, M. E. (2013). Understanding China's Urban Pollution Dynamics.

677 *Journal of Economic Literature*, 51, 3, 731-772.

678

679 **Table 1. Dry weight and chemical properties of lentil seeds, soil, and water samples**

680

| Materials                       | Grain weight (g) | Dry weight (g) | As (mgkg <sup>-1</sup> ) | pH   | Total nitrogen %           | Available phosphorus (mgkg <sup>-1</sup> ) | Exchangeable potassium (mgkg <sup>-1</sup> ) | Available sulfur (mgkg <sup>-1</sup> ) |
|---------------------------------|------------------|----------------|--------------------------|------|----------------------------|--------------------------------------------|----------------------------------------------|----------------------------------------|
| Distilled water                 | ..               | ..             | 0                        | 7.18 | -                          | -                                          | -                                            | -                                      |
| Irrigation water                | ..               | ..             | 0.0208                   | 7    | -                          | -                                          | -                                            | -                                      |
| BARI Mashur 1                   | 10               | 9.47           | 0                        | ..   | -                          | -                                          | -                                            | -                                      |
| BARI Mashur 2                   | 10               | 9.5            | 0.00045                  | ..   | -                          | -                                          | -                                            | -                                      |
| BARI Mashur 3                   | 10               | 9.51           | 0.00485                  | ..   | -                          | -                                          | -                                            | -                                      |
| BARI Mashur 4                   | 10               | 9.43           | 0.05575                  | ..   | -                          | -                                          | -                                            | -                                      |
| BARI Mashur 5                   | 10               | 9.44           | 0                        | ..   | -                          | -                                          | -                                            | -                                      |
| BARI Mashur 6                   | 10               | 9.49           | 0                        | ..   | -                          | -                                          | -                                            | -                                      |
| BARI Mashur 7                   | 10               | 9.53           | 0                        | ..   | -                          | -                                          | -                                            | -                                      |
|                                 |                  |                |                          |      | 1.23                       | 57.71                                      | 150                                          | 698.04                                 |
|                                 |                  |                |                          |      | (12300mgkg <sup>-1</sup> ) |                                            |                                              |                                        |
| Vermi-compost                   | ..               | ..             | 2.6882                   | 6.75 | 0.057                      | 14.41                                      | 120                                          | 9.615                                  |
|                                 |                  |                |                          |      | (570mgkg <sup>-1</sup> )   |                                            |                                              |                                        |
| BJRI Soils (T <sub>3</sub> )    | ..               | ..             | 8.2997                   | 7.93 | 0.11                       | 20.68                                      | 124                                          | 23.07                                  |
|                                 |                  |                |                          |      | (1100 mgkg <sup>-1</sup> ) |                                            |                                              |                                        |
| BSMRAU soils (T <sub>1</sub> )  | ..               | ..             | 5.2237                   | 7.74 | 0.086                      | 9.177                                      | 128                                          | 2.884                                  |
|                                 |                  |                |                          |      | (860mgkg <sup>-1</sup> )   |                                            |                                              |                                        |
| Mathchar soil (T <sub>2</sub> ) | ..               | ..             | 14.6337                  | 7.73 |                            |                                            |                                              |                                        |

681

682 **Table 2. ANOVA of Arsenic accumulations in root and shoot**

| Source of variations (SV) | Degrees of freedom (DF) | Arsenic accumulations in root |                           |            | Arsenic accumulations in shoot |                           |                     |
|---------------------------|-------------------------|-------------------------------|---------------------------|------------|--------------------------------|---------------------------|---------------------|
|                           |                         | Sum of Squares (SS)           | Mean Sum of Squares (MSS) | F value    | Sum of Squares (SS)            | Mean Sum of Squares (MSS) | F value             |
| Variety                   | 6                       | 472                           | 78.67                     | 4.225***   | 151                            | 25.17                     | 1.607 <sup>NS</sup> |
| Treatment                 | 2                       | 18870                         | 9435                      | 507.001*** | 12647                          | 6323.5                    | 404.976***          |
| Variety : Treatment       | 12                      | 756                           | 63                        | 3.387***   | 303                            | 25.25                     | 1.617 <sup>NS</sup> |
| Residuals                 | 84                      | 1563                          | 18.607                    |            | 1312                           | 15.619                    |                     |

683 \*\*\* indicates significant difference at p<0.001 level of significance, <sup>NS</sup> indicates no  
 684 significant difference

685

686

687

688

689

690

691

692 **Table 3. Mean comparison of arsenic accumulations in root and shoot according to the**  
 693 **treatment and varieties**

| Treatment interaction | Arsenic in root | Arsenic in shoot | Interaction of varieties      | Arsenic in root |
|-----------------------|-----------------|------------------|-------------------------------|-----------------|
| -                     | -               | -                | BARI Mashur 1 & BARI Mashur 3 | -3.73317*       |
| -                     | -               | -                | BARI Mashur 1 & BARI Mashur 4 | -2.81283 ·      |
| -                     | -               | -                | BARI Mashur 1 & BARI Mashur 5 | -4.86325**      |
| -                     | -               | -                | BARI Mashur 1 & BARI Mashur 6 | -3.39101*       |
| -                     | -               | -                | BARI Mashur 1 & BARI Mashur 7 | -2.2915         |
| -                     | -               | -                | BARI Mashur 2 & BARI Mashur 3 | -5.45291***     |
| Treatment 1 & 2       | -3.31224**      | -0.9072943NS     | BARI Mashur 2 & BARI Mashur 4 | -4.53258**      |
| Treatment 1 & 3       | -29.949***      | -23.7215229***   | BARI Mashur 2 & BARI Mashur 5 | -6.58299***     |
| Treatment 2 & 3       | -26.6368***     | -22.8142286***   | BARI Mashur 2 & BARI Mashur 6 | -5.11076**      |

694

695 \*\*\* indicates significant difference at  $p < 0.001$  level of significance, \*\* indicates significant  
 696 difference at  $0.001 \leq p < 0.01$  level of significance, \* indicates significant difference at  
 697  $0.01 \leq p < 0.05$  level of significance, (·) Indicates significant difference at  $0.05 \leq p < 0.1$  level of  
 698 significance, <sup>NS</sup> indicates insignificant difference.

699

700 **Table 4. Arsenic accumulation in root according to the interaction between treatment**  
 701 **and varieties mean differences**

| Comparison (Treatment: Variety -Treatment: Variety) | Arsenic in root |
|-----------------------------------------------------|-----------------|
| 3:1-1:1                                             | 24.7691***      |
| 3:2-1:1                                             | 18.8576***      |
| 3:3-1:1                                             | 35.60782***     |
| 3:4-1:1                                             | 30.74864***     |
| 3:5-1:1                                             | 36.92746***     |
| 3:6-1:1                                             | 32.77742***     |
| 3:7-1:1                                             | 29.89708***     |
| 3:1-2:1                                             | 22.88976***     |
| 3:2-2:1                                             | 16.97826***     |
| 3:3-2:1                                             | 33.72848***     |
| 3:4-2:1                                             | 28.8693***      |
| 3:5-2:1                                             | 35.04812***     |
| 3:6-2:1                                             | 30.89808***     |
| 3:7-2:1                                             | 28.01774***     |
| 1:2-3:1                                             | -24.7777***     |
| 2:2-3:1                                             | -22.1289***     |
| 1:3-3:1                                             | -24.9863***     |
| 2:3-3:1                                             | -22.3117***     |

|         |             |
|---------|-------------|
| 3:3-3:1 | 10.83872*   |
| 1:4-3:1 | -24.8239*** |
| 2:4-3:1 | -20.376***  |
| 1:5-3:1 | -24.8492*** |
| 2:5-3:1 | -20.3782*** |
| 3:5-3:1 | 12.15836**  |
| 1:6-3:1 | -24.8359*** |
| 2:6-3:1 | -20.6582*** |
| 1:7-3:1 | -24.3993*** |
| 2:7-3:1 | -21.513***  |
| 3:2-1:2 | 18.86618*** |
| 3:3-1:2 | 35.6164***  |
| 3:4-1:2 | 30.75722*** |
| 3:5-1:2 | 36.93604*** |
| 3:6-1:2 | 32.786***   |
| 3:7-1:2 | 29.90566*** |
| 3:2-2:2 | 16.21742*** |
| 3:3-2:2 | 32.96764*** |
| 3:4-2:2 | 28.10846*** |
| 3:5-2:2 | 34.28728*** |
| 3:6-2:2 | 30.13724*** |
| 3:7-2:2 | 27.2569***  |
| 1:3-3:2 | -19.0748*** |
| 2:3-3:2 | -16.4002*** |
| 3:3-3:2 | 16.75022*** |
| 1:4-3:2 | -18.9124*** |
| 2:4-3:2 | -14.4645*** |
| 3:4-3:2 | 11.89104**  |
| 1:5-3:2 | -18.9377*** |
| 2:5-3:2 | -14.4667*** |
| 3:5-3:2 | 18.06986*** |
| 1:6-3:2 | -18.9244*** |
| 2:6-3:2 | -14.7467*** |
| 3:6-3:2 | 13.91982**  |
| 1:7-3:2 | -18.4878*** |
| 2:7-3:2 | -15.6015*** |
| 3:7-3:2 | 11.03948*   |
| 3:3-1:3 | 35.82506*** |
| 3:4-1:3 | 30.96588*** |
| 3:5-1:3 | 37.1447***  |
| 3:6-1:3 | 32.99466*** |
| 3:7-1:3 | 30.11432*** |
| 3:3-2:3 | 33.15046*** |
| 3:4-2:3 | 28.29128*** |
| 3:5-2:3 | 34.4701***  |
| 3:6-2:3 | 30.32006*** |
| 3:7-2:3 | 27.43972*** |
| 1:4-3:3 | -35.6627*** |

|         |             |
|---------|-------------|
| 2:4-3:3 | -31.2147*** |
| 1:5-3:3 | -35.688***  |
| 2:5-3:3 | -31.217***  |
| 1:6-3:3 | -35.6746*** |
| 2:6-3:3 | -31.4969*** |
| 1:7-3:3 | -35.238***  |
| 2:7-3:3 | -32.3517*** |
| 3:4-1:4 | 30.80348*** |
| 3:5-1:4 | 36.9823***  |
| 3:6-1:4 | 32.83226*** |
| 3:7-1:4 | 29.95192*** |
| 3:4-2:4 | 26.3555***  |
| 3:5-2:4 | 32.53432*** |
| 3:6-2:4 | 28.38428*** |
| 3:7-2:4 | 25.50394*** |
| 1:5-3:4 | -30.8288*** |
| 2:5-3:4 | -26.3578*** |
| 1:6-3:4 | -30.8155*** |
| 2:6-3:4 | -26.6378*** |
| 1:7-3:4 | -30.3789*** |
| 2:7-3:4 | -27.4926*** |
| 3:5-1:5 | 37.0076***  |
| 3:6-1:5 | 32.85756*** |
| 3:7-1:5 | 29.97722*** |
| 3:5-2:5 | 32.5366***  |
| 3:6-2:5 | 28.38656*** |
| 3:7-2:5 | 25.50622*** |
| 1:6-3:5 | -36.9943*** |
| 2:6-3:5 | -32.8166*** |
| 1:7-3:5 | -36.5577*** |
| 2:7-3:5 | -33.6714*** |
| 3:6-1:6 | 32.84424*** |
| 3:7-1:6 | 29.9639***  |
| 3:6-2:6 | 28.66654*** |
| 3:7-2:6 | 25.7862***  |
| 1:7-3:6 | -32.4076*** |
| 2:7-3:6 | -29.5213*** |
| 3:7-1:7 | 29.5273***  |
| 3:7-2:7 | 26.641***   |

702 \*\*\* indicates significant difference at  $p < 0.001$  level of significance, \*\* indicates significant  
703 difference at  $0.001 \leq p < 0.01$  level of significance, \* indicates significant difference at  
704  $0.01 \leq p < 0.05$  level of significance. For treatment, 1= T<sub>1</sub>, 2= T<sub>2</sub> and 3= T<sub>3</sub> and for variety, 1=  
705 BARI Mashur 1, 2= BARI Mashur 2, 3= BARI Mashur 3, 4= BARI Mashur 4, 5= BARI  
706 Mashur 5, 6= BARI Mashur 6, and 7= BARI Mashur 7.

707  
708  
709  
710  
711



712 **Table 5. ANOVA of Arsenic accumulations in root and shoot of BARI Mashur 1 and 5**  
713 **at non-AMF and AMF soil**

| Source of variations (SV) | Degrees of freedom (DF) | Root of BARI Mashur 1 at non-AMF soil |                           |            | Shoot of BARI Mashur 1 at non-AMF soil |                           |            |
|---------------------------|-------------------------|---------------------------------------|---------------------------|------------|----------------------------------------|---------------------------|------------|
|                           |                         | Sum of Squares (SS)                   | Mean Sum of Squares (MSS) | F value    | Sum of Squares (SS)                    | Mean Sum of Squares (MSS) | F value    |
| Treatment                 | 1                       | 1790.2                                | 1790.2                    | 1290.23*** | 108.02                                 | 108.02                    | 773.8***   |
| Residuals                 | 8                       | 11.1                                  | 1.3875                    |            | 1.12                                   | 0.14                      |            |
|                           |                         | Root of BARI Mashur 1 at AMF soil     |                           |            | Shoot of BARI Mashur 1 at AMF soil     |                           |            |
| Treatment                 | 1                       | 1070.7                                | 1070.7                    | 418.2***   | 50.25                                  | 50.25                     | 302.26 *** |
| Residuals                 | 8                       | 20.5                                  | 2.5625                    |            | 1.33                                   | 0.16625                   |            |
|                           |                         | Root of BARI Mashur 5 at non-AMF soil |                           |            | Shoot of BARI Mashur 5 at Non-AMF soil |                           |            |
| Treatment                 | 1                       | 745.3                                 | 745.3                     | 641.12***  | 318.7                                  | 318.7                     | 1019.84*** |
| Residuals                 | 8                       | 9.3                                   | 1.1625                    |            | 2.5                                    | 0.3125                    |            |
|                           |                         | Root of BARI Mashur 5 at AMF soil     |                           |            | Shoot of BARI Mashur 5 at AMF soil     |                           |            |
| Treatment                 | 1                       | 392.6                                 | 392.6                     | 640.98***  | 108.25                                 | 108.25                    | 848.24***  |
| Residuals                 | 8                       | 4.9                                   | 0.6125                    |            | 1.7                                    | 0.2125                    |            |

714 \*\*\* indicates significant difference at p<0.001 level of significance

715

716 **Table 6. ANOVA of arsenic accumulation in root and shoot of BARI Mashur1 and 5 for**  
717 **both soils**

| Source of variations (SV) | Degrees of freedom (DF) | Root of BARI Mashur 1 |                           |            | Shoot of BARI Mashur 1 |                           |            |
|---------------------------|-------------------------|-----------------------|---------------------------|------------|------------------------|---------------------------|------------|
|                           |                         | Sum of Squares (SS)   | Mean Sum of Squares (MSS) | F value    | Sum of Squares (SS)    | Mean Sum of Squares (MSS) | F value    |
| Treatment                 | 1                       | 2815.0                | 2815.0                    | 1428.01*** | 152.81050              | 152.81050                 | 999.04***  |
| Soil                      | 1                       | 75.6                  | 75.6                      | 38.33***   | 8.96594                | 8.96594                   | 58.62***   |
| Treat: Soil               | 1                       | 46.0                  | 46.0                      | 23.32***   | 5.46117                | 5.46117                   | 35.70***   |
| Residuals                 | 16                      | 31.5                  | 1.96875                   |            | 2.45                   | 0.153125                  |            |
|                           |                         | Root of BARI Mashur 5 |                           |            | Shoot of BARI Mashur 5 |                           |            |
| Treatment                 | 1                       | 1109.8                | 1109.8                    | 1250.48*** | 399.2                  | 399.2                     | 1520.76*** |
| Soil                      | 1                       | 53.9                  | 53.9                      | 60.73***   | 44.2                   | 44.2                      | 168.38***  |
| Treat: Soil               | 1                       | 28.0                  | 28.0                      | 31.55***   | 27.7                   | 27.7                      | 105.52***  |
| Residuals                 | 16                      | 14.2                  | 0.8875                    |            | 4.2                    | 0.2625                    |            |

718 \*\*\* indicates significant difference at p<0.001 level of significance

719

720

721

722 **Table 7. Mean comparison of the interaction between treatment and soils on the**  
 723 **reduction of arsenic accumulation in root and shoot of BARI Mashur 1 and 5 for both**  
 724 **soils**

| Comparison                                          | Arsenic in root of BARI Mashur 1 | Arsenic in shoot of BARI Mashur 1 | Arsenic in root of BARI Mashur 5 | Arsenic in shoot of BARI Mashur 5 |
|-----------------------------------------------------|----------------------------------|-----------------------------------|----------------------------------|-----------------------------------|
| T <sub>2</sub> : non AMF - T <sub>1</sub> : non AMF | 26.7598***                       | 6.5734***                         | 17.266***                        | 11.29***                          |
| T <sub>1</sub> : AMF - T <sub>1</sub> : non AMF     | -0.8552 <sup>NS</sup>            | -0.294 <sup>NS</sup>              | -0.9152 <sup>NS</sup>            | -0.6176 <sup>NS</sup>             |
| T <sub>2</sub> : AMF - T <sub>1</sub> : non AMF     | 19.84***                         | 4.1892***                         | 11.616***                        | 5.9626***                         |
| T <sub>1</sub> : AMF - T <sub>2</sub> : non AMF     | -27.615***                       | -6.8674***                        | -18.1812***                      | -11.9076***                       |
| T <sub>2</sub> : AMF - T <sub>2</sub> : non AMF     | -6.9198***                       | -2.3842***                        | -5.65***                         | -5.3274***                        |
| T <sub>2</sub> : AMF - T <sub>1</sub> : AMF         | 20.6952***                       | 4.4832***                         | 12.5312***                       | 6.5802***                         |

726 \*\*\* indicates significant difference at p<0.001 level of significance, <sup>NS</sup> indicates  
 727 insignificant difference

728 **Table 8. ANOVA of arsenic accumulation in root and shoot according to treatment and**  
 729 **varieties for non-AMF and AMF soil**

| Source of variations (SV) | Degrees of freedom (DF) | Root at non-AMF soil |                           |             | Shoot at non-AMF soil |                           |            |
|---------------------------|-------------------------|----------------------|---------------------------|-------------|-----------------------|---------------------------|------------|
|                           |                         | Sum of Squares (SS)  | Mean Sum of Squares (MSS) | F value     | Sum of Squares (SS)   | Mean Sum of Squares (MSS) | F value    |
| Treatment                 | 1                       | 2422.8               | 2422.8                    | 1909.596*** | 398.9                 | 398.9                     | 1772.89*** |
| Variety                   | 1                       | 120.2                | 120.2                     | 94.739***   | 53.2                  | 53.2                      | 236.44***  |
| Treat: Variety            | 1                       | 112.7                | 112.7                     | 88.828***   | 27.8                  | 27.8                      | 123.56***  |
| Residuals                 | 16                      | 20.3                 | 1.26875                   |             | 3.6                   | 0.225                     |            |
|                           |                         | Root at AMF soil     |                           |             | Shoot at AMF soil     |                           |            |
| Treatment                 | 1                       | 1380.0               | 1380.0                    | 869.29***   | 153.00                | 153.00                    | 807.92***  |
| Variety                   | 1                       | 92.4                 | 92.4                      | 58.21***    | 13.25                 | 13.25                     | 69.97***   |
| Treat: Variety            | 1                       | 83.3                 | 83.3                      | 52.47***    | 5.50                  | 5.50                      | 29.04***   |
| Residuals                 | 16                      | 25.4                 | 1.5875                    |             | 3.03                  | 0.189375                  |            |

730 \*\*\* indicate significant difference at p<0.001 level of significance

731  
 732  
 733  
 734  
 735  
 736  
 737  
 738  
 739

740 **Table 9. Means comparison of an interaction effect between treatment and varieties on**  
 741 **arsenic accumulations in root and shoot for non-AMF and AMF soils.**

| Comparison                                                     | Root at non-AMF soil  | Shoot at non-AMF soil | Root at AMF soil      | Shoot at AMF soil    |
|----------------------------------------------------------------|-----------------------|-----------------------|-----------------------|----------------------|
| T <sub>2</sub> : BARI Mashur 1- T <sub>1</sub> : BARI Mashur 1 | 26.7598***            | 6.5734***             | 20.6952***            | 4.4832***            |
| T <sub>1</sub> : BARI Mashur 5- T <sub>1</sub> : BARI Mashur 1 | -0.1566 <sup>NS</sup> | 0.9032 <sup>•</sup>   | -0.2166 <sup>NS</sup> | 0.5796 <sup>NS</sup> |
| T <sub>2</sub> : BARI Mashur 5- T <sub>1</sub> : BARI Mashur 1 | 17.1094***            | 12.1932***            | 12.3146***            | 7.1598***            |
| T <sub>1</sub> : BARI Mashur 5- T <sub>2</sub> : BARI Mashur 1 | -26.9164***           | -5.6702***            | 20.9118***            | -3.9036***           |
| T <sub>2</sub> : BARI Mashur 5- T <sub>2</sub> : BARI Mashur 1 | -9.6504***            | 5.6198***             | -8.3806***            | 2.6766***            |
| T <sub>2</sub> : BARI Mashur 5- T <sub>1</sub> : BARI Mashur 5 | 17.266***             | 11.29***              | 12.5312***            | 6.5802***            |

742 \*\*\* indicates significant difference at p<0.001 level of significance, <sup>NS</sup> indicate insignificant  
 743 difference

744

745 **Table 10. ANOVA of arsenic accumulation in root and shoot according to treatment,**  
 746 **varieties and soils in pot experiment**

| Source of variations (SV) | Degrees of freedom (DF) | Arsenic accumulations in root |                           |                     | Arsenic accumulations in shoot |                           |            |
|---------------------------|-------------------------|-------------------------------|---------------------------|---------------------|--------------------------------|---------------------------|------------|
|                           |                         | Sum of Squares (SS)           | Mean Sum of Squares (MSS) | F value             | Sum of Squares (SS)            | Mean Sum of Squares (MSS) | F value    |
| Treatment                 | 1                       | 3730                          | 3730                      | 2594.78***          | 523.0                          | 523.0                     | 2497.91*** |
| Variety                   | 1                       | 212                           | 212                       | 147.48***           | 59.8                           | 59.8                      | 285.61***  |
| Soil                      | 1                       | 129                           | 129                       | 89.74***            | 46.5                           | 46.5                      | 222.09***  |
| Treat: Variety            | 1                       | 195                           | 195                       | 135.65***           | 29.0                           | 29.0                      | 138.51***  |
| Treat: Soil               | 1                       | 73                            | 73                        | 50.78***            | 28.9                           | 28.9                      | 138.03***  |
| Variety : Soil            | 1                       | 1                             | 1                         | 0.696 <sup>NS</sup> | 6.7                            | 6.7                       | 32.02***   |
| T:V:S                     | 1                       | 1                             | 1                         | 0.696 <sup>NS</sup> | 4.3                            | 4.3                       | 20.54***   |
| Residuals                 | 32                      | 46                            | 1.4375                    |                     | 6.7                            | 0.209375                  |            |

747 \*\*\* indicates significant difference at p<0.001 level of significance, <sup>NS</sup> indicate insignificant  
 748 difference

749

750

751

752

753

754

755

756

757

758

759

760

761 **Table 11. Mean comparison of arsenic accumulation in root and shoot for both lentil**  
 762 **varieties according to the interaction of treatment & soils, and varieties & soils in pot**  
 763 **experiment**

| 765 Interaction of treatment & soils                   |                                                  |                       |
|--------------------------------------------------------|--------------------------------------------------|-----------------------|
| T <sub>2</sub> : non AMF-T <sub>1</sub> : non-AMF soil | 22.0129***                                       | 8.9317***             |
| T <sub>1</sub> : AMF-T <sub>1</sub> : non-AMF soil     | -0.8852 <sup>NS</sup>                            | -0.4558 <sup>NS</sup> |
| T <sub>2</sub> : AMF-T <sub>1</sub> : non-AMF soil     | 15.728***                                        | 5.0759***             |
| T <sub>1</sub> : AMF-T <sub>2</sub> : non-AMF soil     | -22.8981***                                      | -9.3875***            |
| T <sub>2</sub> : AMF-T <sub>2</sub> : non-AMF soil     | -6.2849***                                       | -3.8558***            |
| T <sub>2</sub> : AMF-T <sub>1</sub> : AMF soil         | 16.6132***                                       | 5.5317***             |
| 766 Interaction of varieties & soils                   |                                                  |                       |
| Comparison                                             | Mean difference of arsenic accumulation in shoot |                       |
| BARI Mashur 5: non AMF-BARI Mashur 1: non- AMF soil    | 3.2615***                                        |                       |
| BARI Mashur 1: AMF-BARI Mashur 1: non- AMF soil        | -1.3391***                                       |                       |
| BARI Mashur 5: AMF-BARI Mashur 1: non- AMF soil        | 0.289 <sup>NS</sup>                              |                       |
| BARI Mashur 1: AMF-BARI Mashur 2: non- AMF soil        | -4.6006***                                       |                       |
| BARI Mashur 5: AMF-BARI Mashur 5: non- AMF soil        | -2.9725***                                       |                       |
| BARI Mashur 5: AMF-BARI Mashur 1: AMF soil             | 1.6281***                                        |                       |

767 \*\*\* indicate significant difference at 0% (p<0.001) level of significance, <sup>NS</sup> indicate  
 768 insignificant difference

769  
 770 **Table 12. Means comparison of an interaction effect between treatment, varieties and**  
 771 **soils on arsenic accumulations in shoot**

| Comparison                                                                             | Mean difference      |
|----------------------------------------------------------------------------------------|----------------------|
| T <sub>2</sub> : BARI Mashur 1: non AMF - T <sub>1</sub> : BARI Mashur 1: non AMF soil | 6.5734***            |
| T <sub>1</sub> : BARI Mashur 5: non AMF - T <sub>1</sub> : BARI Mashur 1: non AMF soil | 0.9032 <sup>NS</sup> |
| T <sub>2</sub> : BARI Mashur 5: non AMF - T <sub>1</sub> : BARI Mashur 1: non AMF soil | 12.1932***           |
| T <sub>2</sub> : BARI Mashur 1: AMF - T <sub>1</sub> : BARI Mashur 1: non AMF soil     | 4.1892***            |
| T <sub>1</sub> : BARI Mashur 5: AMF - T <sub>1</sub> : BARI Mashur 1: non AMF soil     | 0.2856 <sup>NS</sup> |
| T <sub>2</sub> : BARI Mashur 5: AMF - T <sub>1</sub> : BARI Mashur 1: non AMF soil     | 6.8658***            |
| T <sub>1</sub> : BARI Mashur 5: non AMF - T <sub>2</sub> : BARI Mashur 1: non AMF soil | -5.6702***           |
| T <sub>2</sub> : BARI Mashur 5: non AMF - T <sub>2</sub> : BARI Mashur 1: non AMF soil | 5.6198***            |
| T <sub>1</sub> : BARI Mashur 1: AMF - T <sub>1</sub> : BARI Mashur 1: non AMF soil     | -6.8674***           |
| T <sub>2</sub> : BARI Mashur 1: AMF - T <sub>2</sub> : BARI Mashur 1: non AMF soil     | -2.3842***           |
| T <sub>1</sub> : BARI Mashur 5: AMF - T <sub>2</sub> : BARI Mashur 1: non AMF soil     | -6.2878***           |
| T <sub>2</sub> : BARI Mashur 5: non AMF - T <sub>1</sub> : BARI Mashur 5: non AMF soil | 11.29***             |
| T <sub>1</sub> : BARI Mashur 1: AMF - T <sub>1</sub> : BARI Mashur 5: non AMF soil     | -1.1972**            |
| T <sub>2</sub> : BARI Mashur 1: AMF - T <sub>1</sub> : BARI Mashur 5: non AMF soil     | 3.286***             |
| T <sub>2</sub> : BARI Mashur 5: AMF - T <sub>1</sub> : BARI Mashur 5: non AMF soil     | 5.9626***            |
| T <sub>1</sub> : BARI Mashur 1: AMF - T <sub>2</sub> : BARI Mashur 5: non AMF soil     | -12.4872***          |
| T <sub>2</sub> : BARI Mashur 1: AMF - T <sub>2</sub> : BARI Mashur 5: non AMF soil     | -8.004***            |
| T <sub>1</sub> : BARI Mashur 5: AMF - T <sub>2</sub> : BARI Mashur 5: non AMF soil     | -11.9076***          |
| T <sub>2</sub> : BARI Mashur 5: AMF - T <sub>2</sub> : BARI Mashur 5: non AMF soil     | -5.3274***           |

|                                                                                |            |
|--------------------------------------------------------------------------------|------------|
| T <sub>2</sub> : BARI Mashur 1: AMF - T <sub>1</sub> : BARI Mashur 1: AMF soil | 4.4832***  |
| T <sub>2</sub> : BARI Mashur 5: AMF - T <sub>1</sub> : BARI Mashur 1: AMF soil | 7.1598***  |
| T <sub>1</sub> : BARI Mashur 5: AMF - T <sub>2</sub> : BARI Mashur 1: AMF soil | -3.9036*** |
| T <sub>2</sub> : BARI Mashur 5: AMF - T <sub>2</sub> : BARI Mashur 1: AMF soil | 2.6766***  |
| T <sub>2</sub> : BARI Mashur 5: AMF - T <sub>1</sub> : BARI Mashur 5: AMF soil | 6.5802***  |

---

772 \*\*\* indicates significant difference at p<0.001 level of significance, <sup>NS</sup> indicate insignificant  
773 difference  
774

bioRxiv preprint doi: <https://doi.org/10.1101/522714>; this version posted January 17, 2019. The copyright holder for this preprint (which was not certified by peer review) is the author/funder. This article is a US Government work. It is not subject to copyright under 17 USC 105 and is also made available for use under a CC0 license.

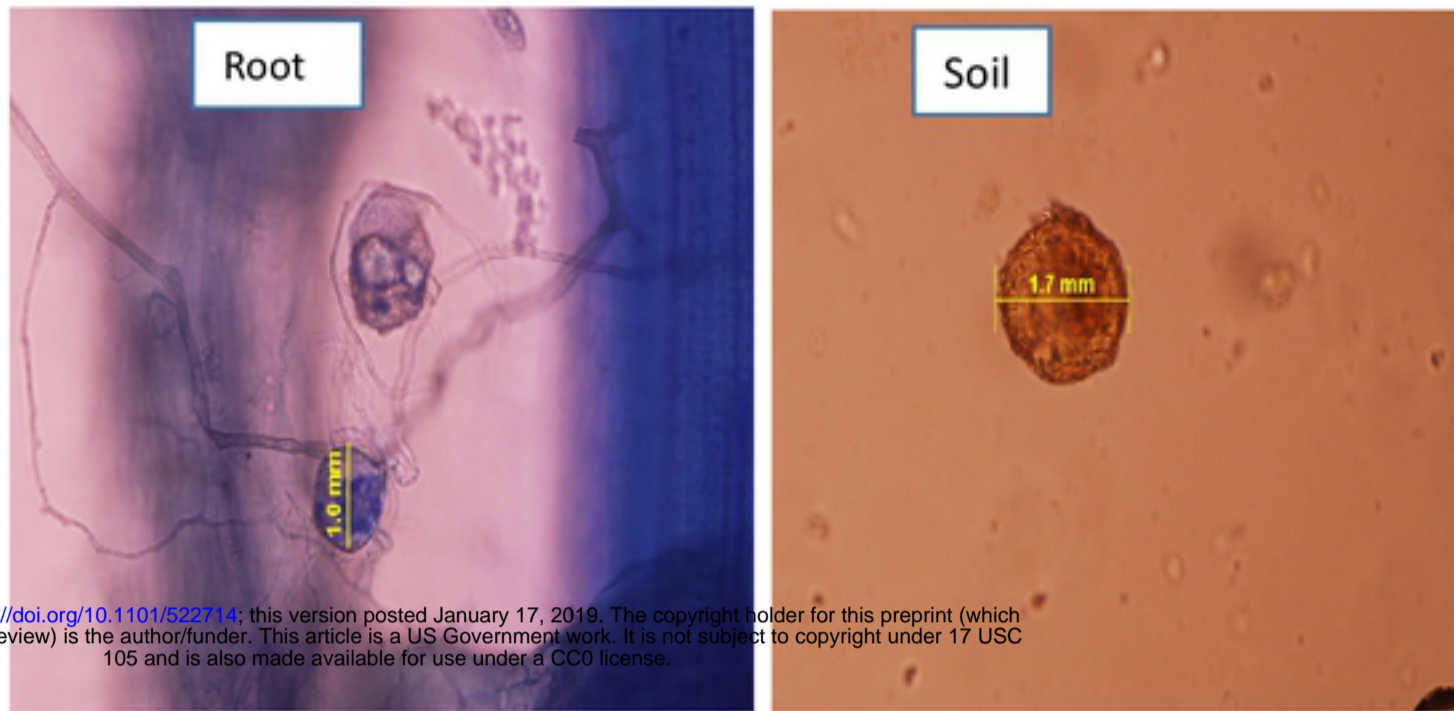

Figure 1. Spore size of AMF in root and soil samples

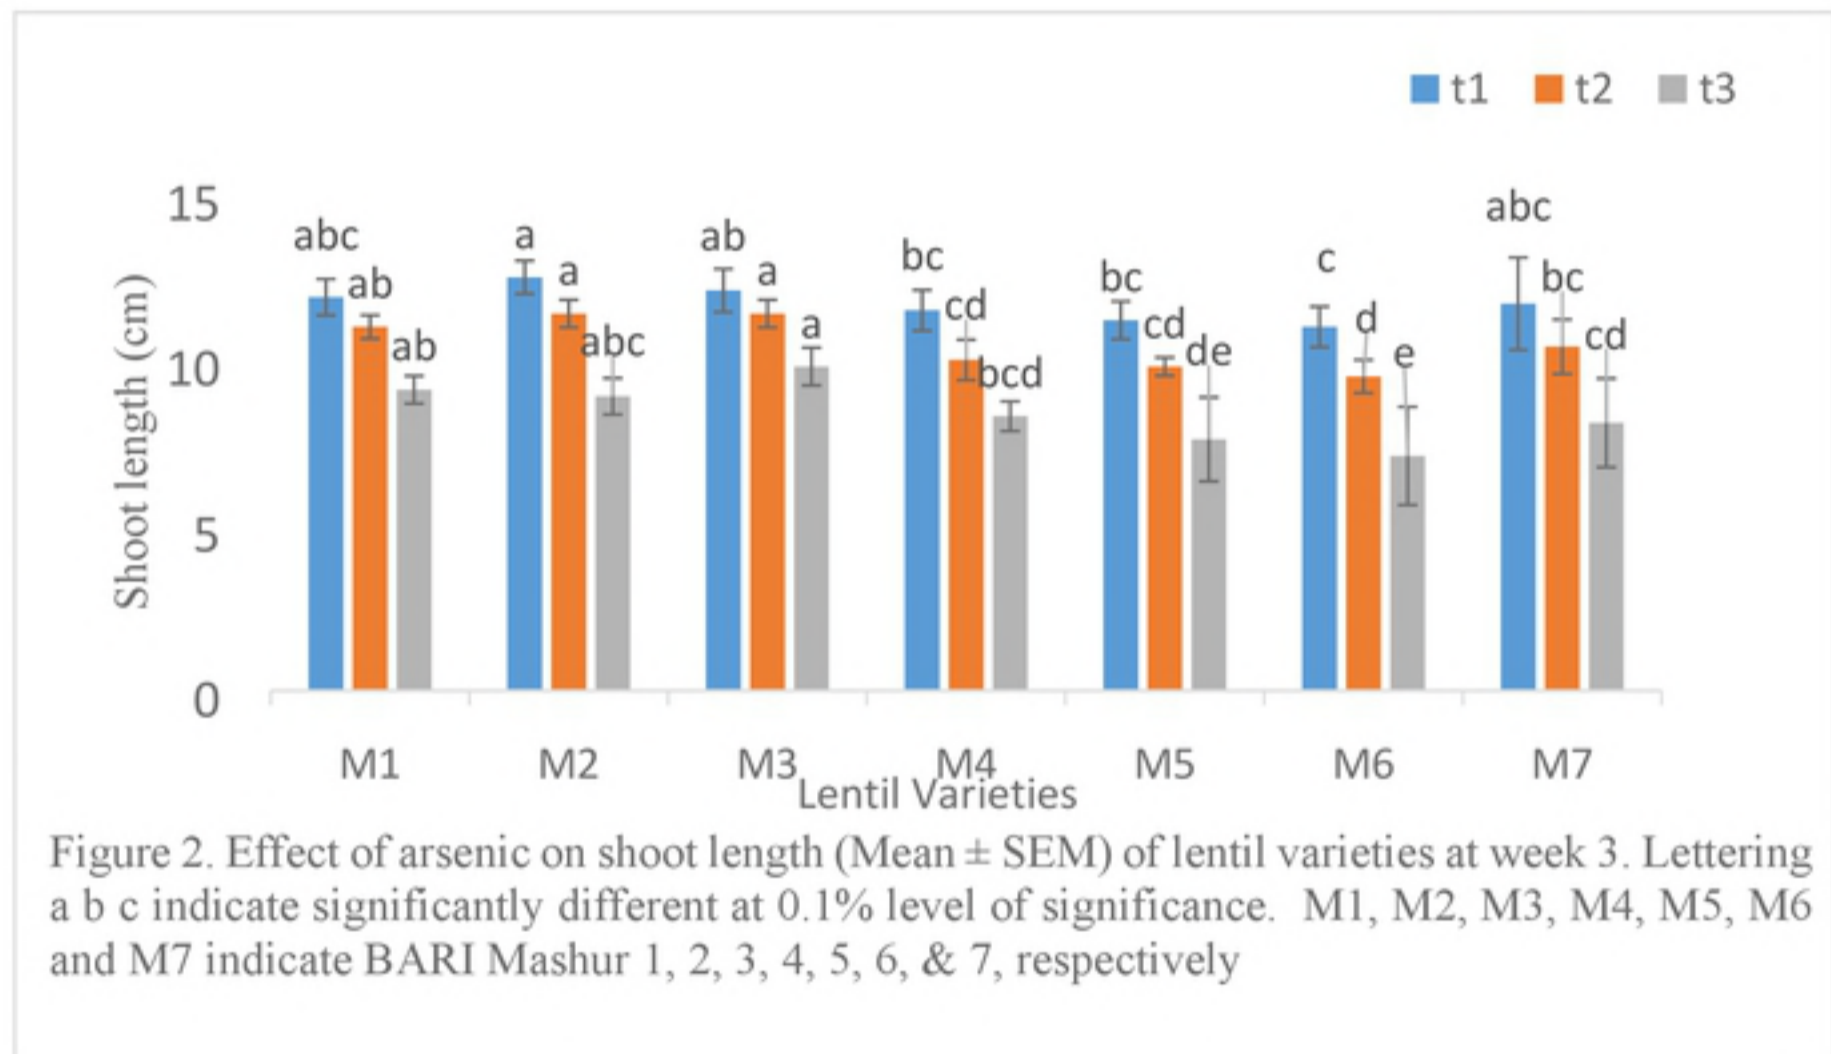

Source: https://www.biorxiv.org/content/10.1101/522714v1.full.pdf
